# Supplementary material for: Insights into the stable layered structure of a Li-rich cathode material for lithium-ion batteries
Source: Royal Society of Chemistry journal article supplement (doi:10.1039/c7ta05971j), 2017-01-01
Supplement: c7ta05971j1.pdf [file c7ta05971j1.pdf]

*Supporting Information*

**Insights into stable layered structure of Li-rich cathode material for Lithium-ion Batteries**

Juan An<sup>a</sup>, Liyi Shi<sup>a</sup>, Guorong Chen<sup>a\*</sup>, Hongjiang Liu<sup>a</sup>, Shuai Yuan<sup>a</sup>, Musen Li<sup>a</sup>, Shimou Chen<sup>b</sup> and Dongsong Zhang<sup>a\*</sup>

a. Department of Chemistry, Research Center of Nano Science and Technology, Shanghai University, Shanghai, 200444, China. Fax: +86 21 66136079; \*E-mail: chengr@t.shu.edu.cn, dszhang@shu.edu.cn.

b. Institute of Process Engineering, Chinese Academy of Sciences Beijing, 100190, China.

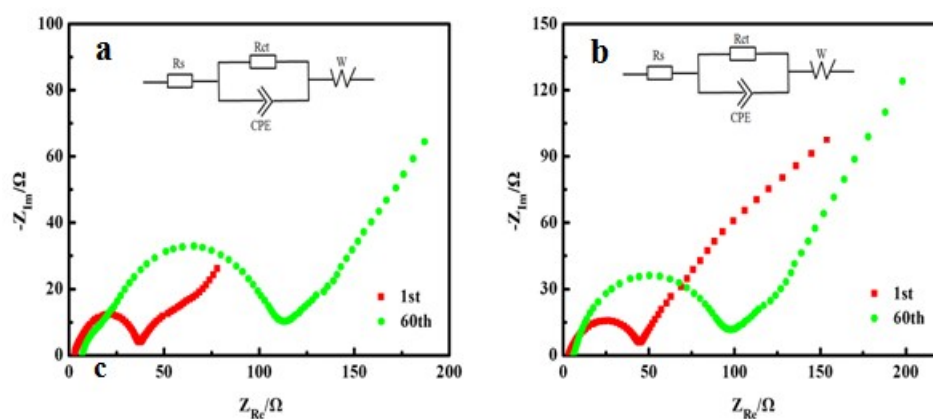

**Fig. S1** Electrochemical impedance spectra (EIS) of the LNMOS<sub>x</sub> in different cycles at 0.1 C rate . (a) LNMOS<sub>0.01</sub> (b) LNMOS<sub>0.05</sub>. The insets are enlarged spectra in the high frequency region. EIS were measured in the open circuit mode when discharged to 2.0 V(vs. Li/Li<sup>+</sup>).

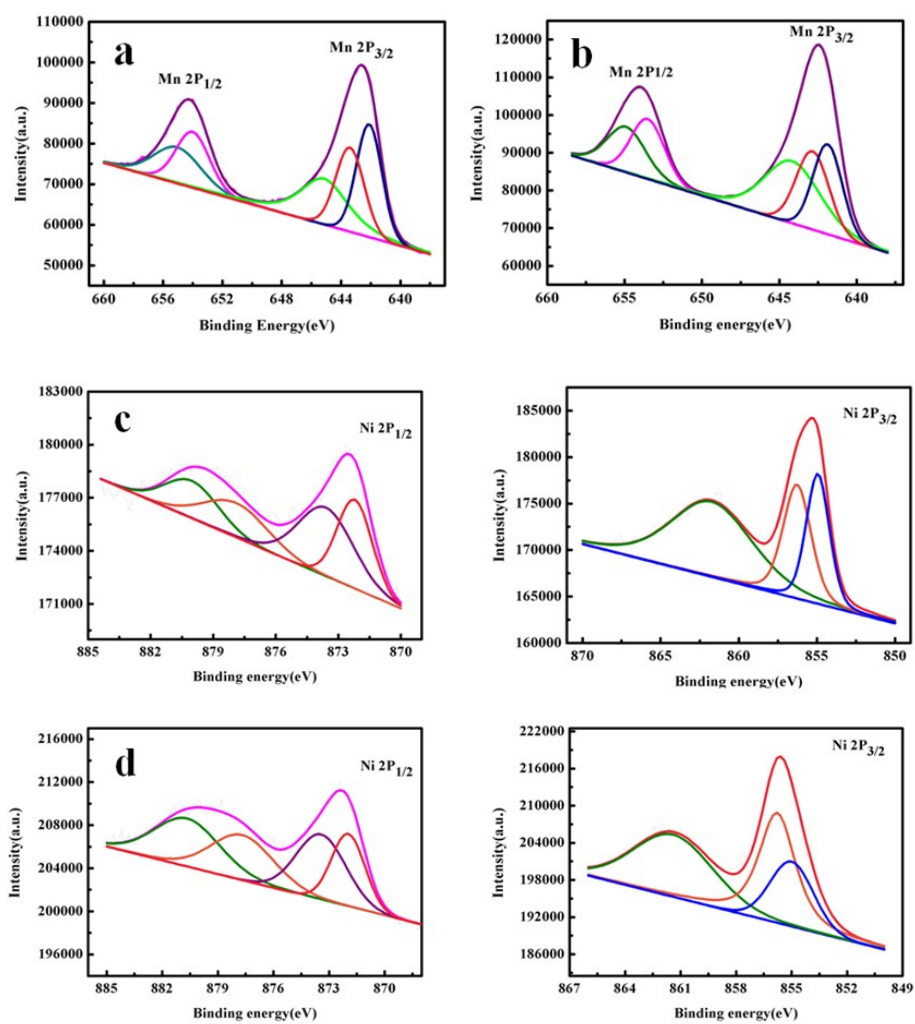

**Fig. S2** X-ray Photoelectron Spectroscopy (XPS) of the oxides. Mn 2p of LNMO and LNMOS<sub>0.03</sub>(a and b), Ni 2p of LNMO and LNMOS<sub>0.03</sub>(c and d).

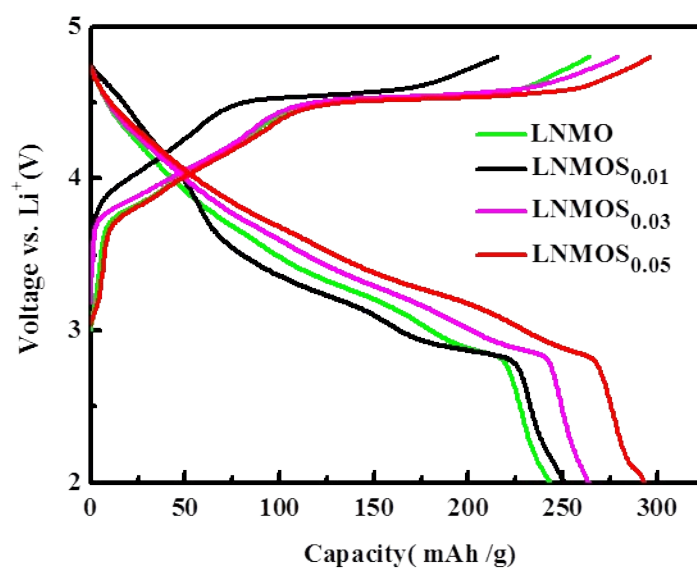

**Fig. S3** The charge–discharge curves of the LNMO and LNMIS in the first cycle at 0.1 C rate between 2.0 and 4.8 V (vs. Li/Li<sup>+</sup>) at RT.

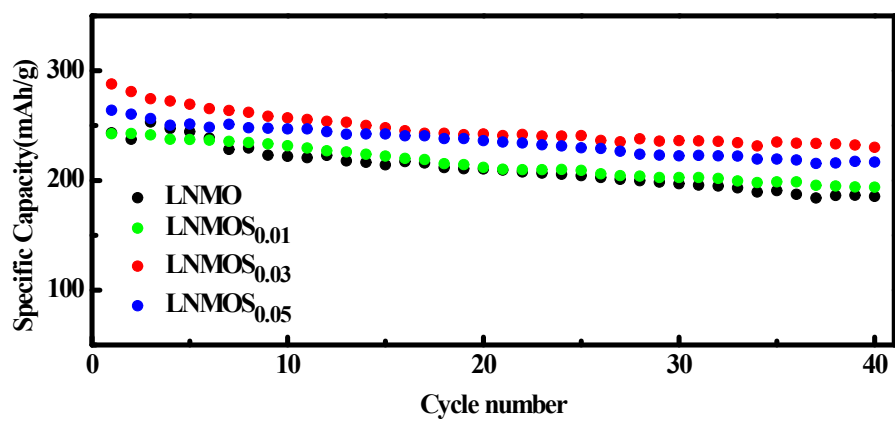

**Fig. S4** The cycle performance of the different proportions of sulfur doped LNMO at 0.1 C rate between 2.0 and 4.8 V (vs. Li/Li<sup>+</sup>) at RT.

The SEM diagram of the pristine and the sulfur doped sample are shown in Fig. S5. From (a) to (d) can be seen that the samples are showing a spherical morphology. The diameter of the particles is about 200-300nm. It is beneficial for good contact of the electrolyte and electrode materials. The morphology of the particles is not changed by the sulfur doping.

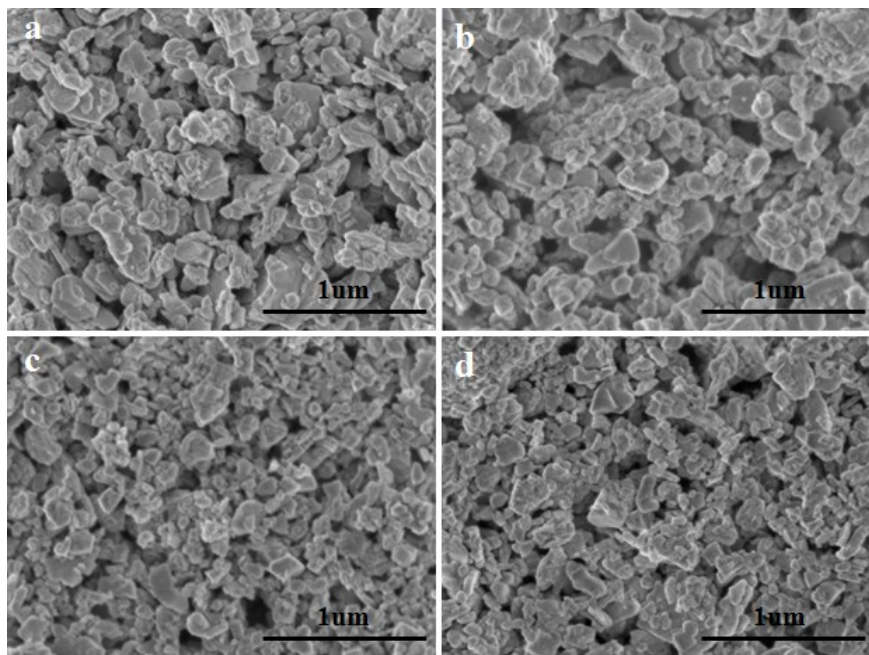

**Fig. S5** The SEM images of the oxides. (a) LNMO (b) LNMOS<sub>0.01</sub> (c) LNMOS<sub>0.03</sub> and (d) LNMOS<sub>0.05</sub>.

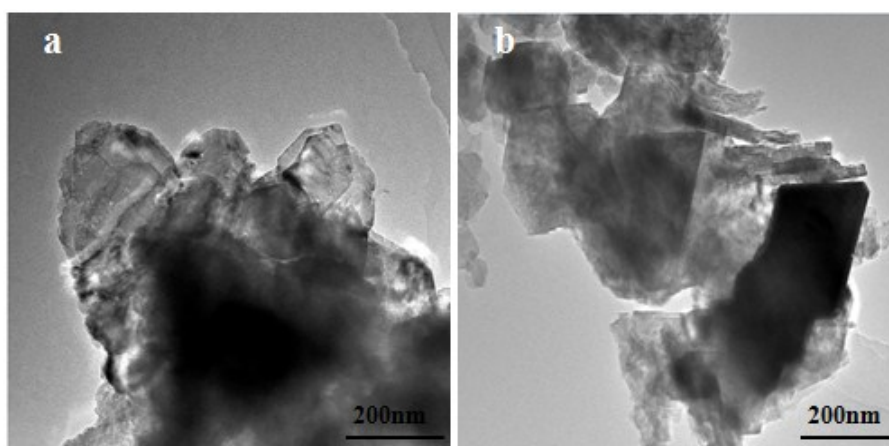

**Fig. S6** The TEM images of the rich lithium cathode materials. (a) LNMO at 200 nm, (b) LNMOS<sub>0.03</sub> at 200 nm

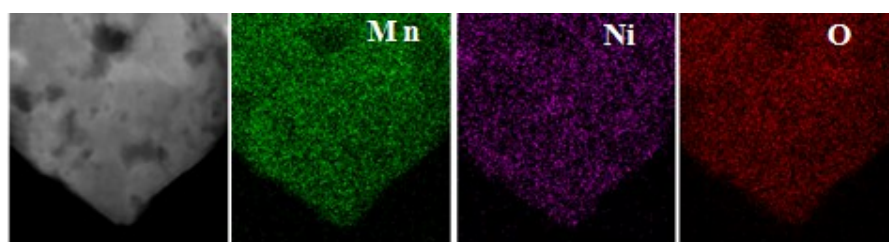

**Fig. S7** The TEM images of element mapping for Ni, Mn, O in LNMO sample

**References:**

- [1] Yongqing Wang, Zhenzhong Yang, Yumin Qian, Lin Gu, Haoshen Zhou, *Adv. Mater.* 2015, **27**, 3917.
- [2] Pilgun Oh, Seungjun Myeong, Woongrae Cho, Min-Joon Lee, Minseong Ko, Hu Young Jeong, Jaephil Cho, *Nano Lett.* 2014, **14**, 5967.
